# Supplementary material
Source: Springer Nature journal article supplement (https://www.springermedizin.de/resource/supplementary/12889_2010_2508_MOESM6_ESM.pdf/9486212)
Supplement: MOESM6 [file 9486212]

| Variables                                                           | Dermatomyositis        | Polymyositis           | Total                  |
|---------------------------------------------------------------------|------------------------|------------------------|------------------------|
| <b>NEOPLASMS AS AN CAUSE OF DEATH</b>                               |                        |                        |                        |
| Underlying                                                          | 13 (36.1)              | 0 (0.0)                | 13 (23.2)              |
| Associated (Non-underlying)                                         | 23 (63.9)              | 20 (100.0)             | 43 (76.8)              |
| Total                                                               | 36 (100.0)             | 20 (100.0)             | 56 (100.0)             |
| <b>STANDARDIZED MORTALITY RATES (PER 1.000.000 POPULATION)</b>      |                        |                        |                        |
| Value (Confidence interval $\pm$ 95%)                               | 0.0446 (0.0300-0.0591) | 0.0249 (0.0140-0.0359) | 0.0695 (0.0512-0.0877) |
| <b>GENDER</b>                                                       |                        |                        |                        |
| Male                                                                | 8 (22.2)               | 8 (40.0)               | 16 (28.6)              |
| Female                                                              | 28 (77.8)              | 12 (60.0)              | 40 (71.4)              |
| Total                                                               | 36 (100.0)             | 20 (100.0)             | 56 (100.0)             |
| Ratio F:M                                                           | 3.5:1                  | 1.5:1                  | 2.5:1                  |
| <b>AGE AT DEATH (YEARS)</b>                                         |                        |                        |                        |
| Mean (Standard deviation)                                           | 61.50 ( $\pm$ 13.66)   | 61.05 ( $\pm$ 15.82)   | 61.34 ( $\pm$ 14.38)   |
| Median                                                              | 64.50                  | 64.50                  | 64.50                  |
| Mode                                                                | 50.50                  | 54.50                  | 50.50                  |
| <b>SITES (CID-9) (CID-10)</b>                                       |                        |                        |                        |
| Digestive organs (150-159) (C15-C26)                                | 9 (25.0)               | 3 (15.0)               | 12 (21.4)              |
| <i>Stomach (151.9) (C16.9)</i>                                      | 2 (5.6)                | 0 (0.0)                | 2 (3.6)                |
| <i>Duodenum (152.0)</i>                                             | 1 (2.8)                | 0 (0.0)                | 1 (1.8)                |
| <i>Colon (C18.9)</i>                                                | 1 (2.8)                | 1 (5.0)                | 2 (3.6)                |
| <i>Rectum (154.1)</i>                                               | 1 (2.8)                | 0 (0.0)                | 1 (1.8)                |
| <i>Intestine (159.0)</i>                                            | 1 (2.8)                | 0 (0.0)                | 1 (1.8)                |
| <i>Unspecified digestive organ (159.9)</i>                          | 0 (0.0)                | 1 (5.0)                | 1 (1.8)                |
| <i>Biliary tract (C24.9)</i>                                        | 1 (2.8)                | 0 (0.0)                | 1 (1.8)                |
| <i>Spleen (C26.1)</i>                                               | 1 (2.8)                | 0 (0.0)                | 1 (1.8)                |
| Breast (174) (C50)                                                  | 8 (22.2)               | 4 (20.0)               | 12 (21.4)              |
| Female genital organs (179-189) (C51-C58)                           | 7 (19.4)               | 1 (5.0)                | 8 (14.3)               |
| <i>Cervix uteri (180.9) (C53.9)</i>                                 | 2 (5.6)                | 1 (5.0)                | 3 (5.4)                |
| <i>Ovary (183.0) (C56)</i>                                          | 5 (13.9)               | 0 (0.0)                | 5 (8.9)                |
| Lung (162.9) (C34)                                                  | 4 (11.1)               | 2 (10.0)               | 6 (10.7)               |
| Lymphoid, haematopoietic and related tissues (200-208) (C81-C96)    | 3 (8.3)                | 3 (15.0)               | 6 (10.7)               |
| <i>Hodgkin's disease (C81.9)</i>                                    | 0 (0.0)                | 1 (5.0)                | 1 (1.8)                |
| <i>Non-Hodgkin's lymphoma (202.8) (C85.9)</i>                       | 3 (8.3)                | 0 (0.0)                | 3 (5.4)                |
| <i>Myeloid leukaemia (C92.1)</i>                                    | 0 (0.0)                | 1 (5.0)                | 1 (1.8)                |
| <i>Polycythaemia vera (D45)</i>                                     | 0 (0.0)                | 1 (5.0)                | 1 (1.8)                |
| Urinary tract (188-189) (C64-C68)                                   | 2 (5.6)                | 2 (10.0)               | 4 (7.1)                |
| <i>Kidney (189.0)</i>                                               | 0 (0.0)                | 1 (5.0)                | 1 (1.8)                |
| <i>Bladder (C67.9)</i>                                              | 2 (5.6)                | 1 (5.0)                | 3 (5.4)                |
| Other                                                               | 3 (8.3)                | 5 (25.0)               | 8 (14.3)               |
| <i>Base of tongue (C01)</i>                                         | 1 (2.8)                | 0 (0.0)                | 1 (1.8)                |
| <i>Prostate (185.9)</i>                                             | 0 (0.0)                | 1 (5.0)                | 1 (1.8)                |
| <i>Kaposi's sarcoma (C46.9)</i>                                     | 0 (0.0)                | 1 (5.0)                | 1 (1.8)                |
| <i>Abdomen (195.2)</i>                                              | 0 (0.0)                | 1 (5.0)                | 1 (1.8)                |
| <i>Malignant neoplasm without specification of site (199) (C80)</i> | 2 (5.6)                | 2 (10.0)               | 4 (7.1)                |
| Total                                                               | 36 (100.0)             | 20 (100.0)             | 56 (100.0)             |

Source: Fundação Sistema Estadual de Análise de Dados (SEADE)
